# Supplementary material for: Chd1 co-localizes with early transcription elongation factors independently of H3K36 methylation and releases stalled RNA polymerase II at introns
Source: PubMed Central journal article supplement (PMC4230344; doi:10.1186/1756-8935-7-32), 2014-10-27

## Supplemental figures

**Figure S1** (A) Nucleosome disruption is independently observed in a strain deleted for *CHD1* by an alternative G418 resistance marker. (B) Box plot of correlation coefficients measured by shapeDiff showing nucleosome arrays are significantly disrupted at the gene bodies of highly transcribed genes in *chd1Δ*.

**Figure S2** Our Chd1 occupancy data (bottom track in each panel) is consistent with published data from the study of Gkikopoulos T et al. (*Science* 2011, 333:1758-1760) (A) Wide view, (B) Close-up view of two example genes.

**Figure S3** Myc-Chd1 was immunoprecipitated with anti-Myc conjugated agarose beads, then the purified protein complexes were probed with antibodies detecting RNAPII Ser 5-P and Ser 2-P, respectively.

**Figure S4** (A) Average profiles of RNAPII Ser 5-P and Ser 2-P occupancy for the high TR genes. The shaded bands represent the 95% confidence interval of the data. The average peak shapes of RNAPII Ser 5-P show a small shift toward 5' end in *chd1Δ* relative to WT cells. (B) Average profiles of histone exchange rate for all genes in WT and *chd1Δ*, aligned by the 5' end and 3' end of introns. Histone exchange data were obtained from Smolle T et al (*Nat Struct Mol Biol* 2012, **19**:884-892).

**Figure S5** (A) Chd1 ChIP-seq in WT and *set2Δ*. Lack of sequencing reads on the *SET2* genomic region confirms successful deletion of *SET2* in the strain used to generate Chd1 ChIP-seq data. (B) Deletion of *SET2* does not affect the expression levels of 13X-Myc-tagged Chd1, but significantly reduces H3K36me3 levels.

**Figure S6** (A) Average nucleosome profile shows high similarity between replicate WT samples. The similarity between WT and *set2Δ* is comparable to independent replicate WT samples. (B) Peak shape comparison by shapeDiff

shows that nucleosome occupancy in *set2Δ* is quantitatively indistinguishable from replicates.

Figure S1

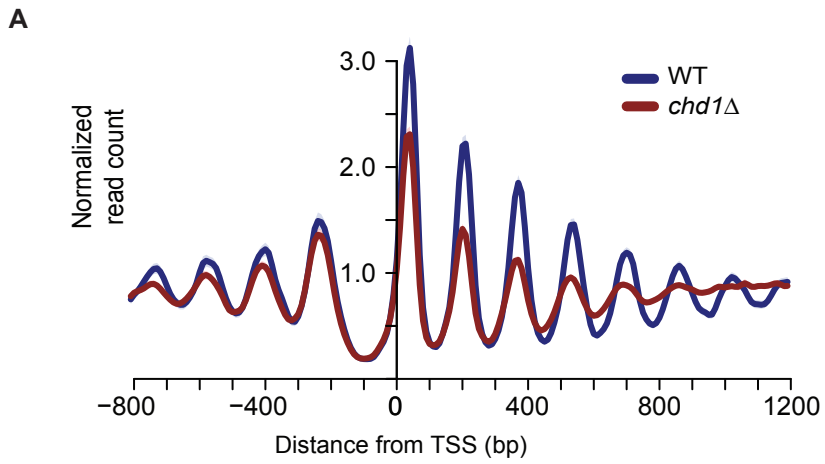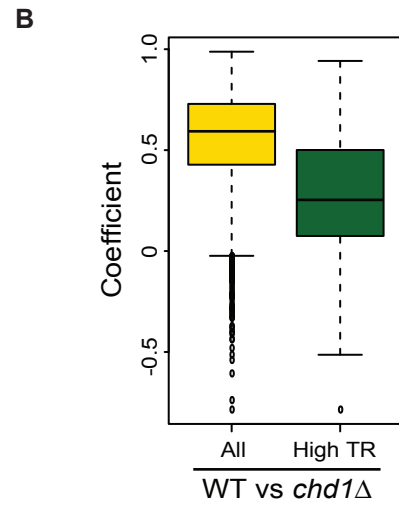



Figure S3

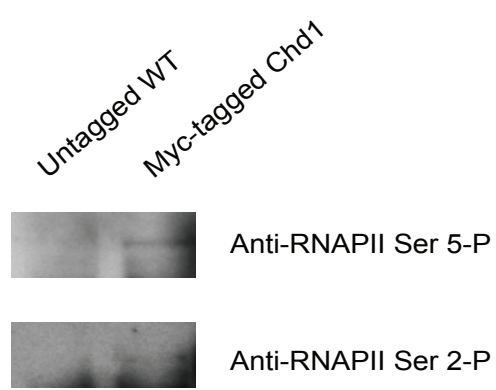

Figure S4

A

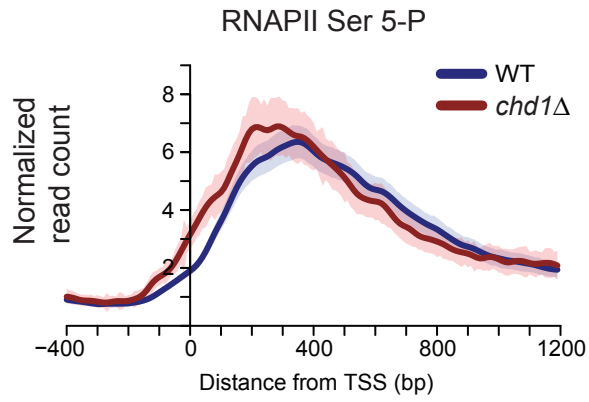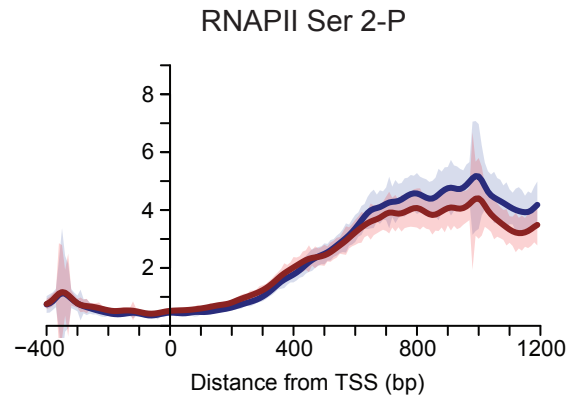

B

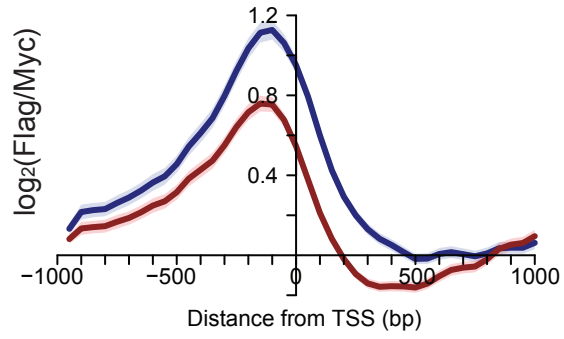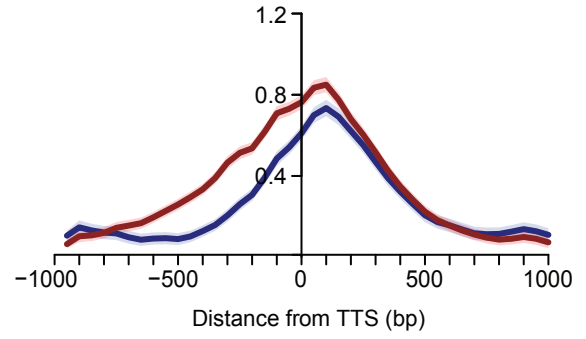



Figure S6

A

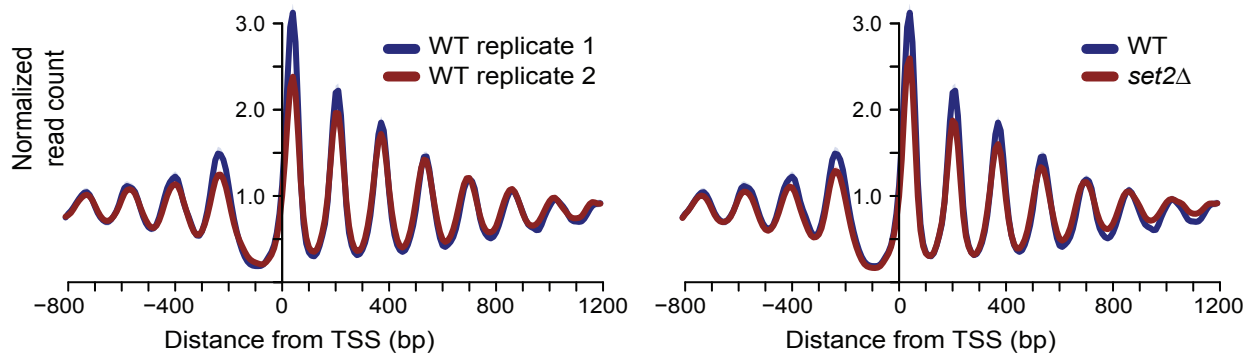

B

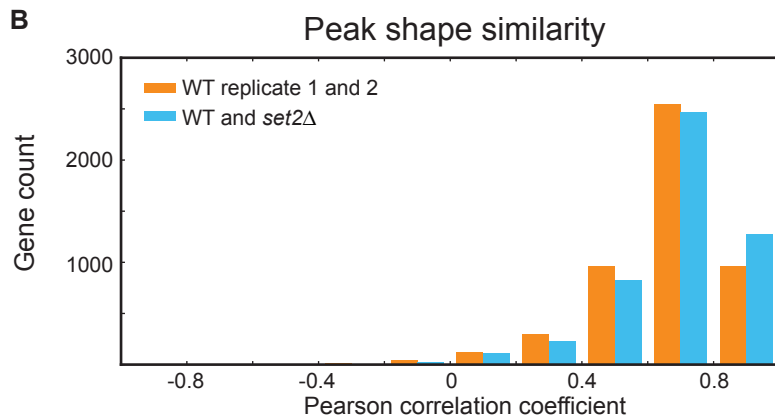

Supplement: 13072_2014_334_MOESM1_ESM.pdf [file 13072_2014_334_MOESM1_ESM.pdf]
